# Supplementary material for: Integrated transcriptomic and metabolomic analyses to decipher the regulatory mechanisms of polystyrene nanoplastic-induced metabolic disorders in hepatocytes
Source: Royal Society of Chemistry journal article supplement (doi:10.1039/d5en00161g), 2025-01-01
Supplement: d5en00161g1.pdf [file d5en00161g1.pdf]

**Integrated transcriptomic and metabolomic analysis to decipher the  
regulatory mechanisms of polystyrene nanoplastic-induced metabolic  
disorders in hepatocytes**

Yuting Fang <sup>a,b</sup>, Yukang Zhang <sup>a,c</sup>, Tingting Wei <sup>a,b</sup>, Huraira Akhtar <sup>a,b</sup>, Yuqing  
Song <sup>a</sup>, Yajie Wang <sup>d</sup>, Man Yang <sup>a,b</sup>, Rongzhang Hao <sup>a,b</sup>, Yanbo Li <sup>a,b</sup>, Zhiwei Sun <sup>a,b</sup>,  
Ji Wang <sup>a,b,\*</sup>

<sup>a</sup> Department of Toxicology and Sanitary Chemistry, School of Public Health, Capital  
Medical University, Beijing 100069, China

<sup>b</sup> Beijing Key Laboratory of Environmental and Aging, Capital Medical University,  
Beijing 100069, China

<sup>c</sup> Shanxi Provincial Center for Disease Control and Prevention, Taiyuan 030012,  
Shanxi, China

<sup>d</sup> Department of Clinical Laboratory, Beijing Ditan Hospital, Capital Medical  
University, Beijing 100015, China

\*Corresponding authors at Department of Toxicology and Sanitary Chemistry, School  
of Public Health, Capital Medical University, Beijing 100069, China.

Email address: [wangji@ccmu.edu.cn](mailto:wangji@ccmu.edu.cn)

## **Text S1**

### **1. Materials and methods**

#### **In vivo fluorescence imaging**

The six-week-old C57BL/6 male mice were employed to determine the targeted effector organs after single gavage with red-fluorescent labelled PSNPs. Mice without PSNPs exposure served as control. We appreciate the reviewer's inquiry regarding the dosage rationale. The 150 mg/kg·bw PSNPs dose for gastric gavage was determined based on epidemiological data on human oral microplastic intake (0.1-5 g/week)<sup>1</sup>. Using body surface area normalization for interspecies dose conversion<sup>2</sup>, this mouse-equivalent dose translates to a human equivalent dose of 12.195 mg/kg/day for a standard 60 kg adult. This corresponds to a weekly intake of 5.0 g, which aligns precisely with the estimated human exposure range. After a single gavage of 150 mg/kg·bw of particles, changes in fluorescence intensity were observed at intervals of 0, 0.5, 1, 2, 4, 6, 8, 12, and 24 h. After 12 h and 24 h of exposure to red fluorescent labeled PSNPs, mice from each group were sacrificed. Tissues were collected and rinsed with saline. Subsequently, the tissues were meticulously arranged on a black background. The fluorescence signal of the whole body and each organ (heart, lung, liver, spleen, kidney, intestine) were visualized at an excitation wavelength/emission wavelength of 640/680 nm using a small animal in vivo analysis system (PerkinElmer, USA). All animal care and experimentation were conducted according to National Guidelines for Animal Care and Use, and approved by the Animal Experimental Ethics Committee of Capital Medical University (Ethical number, AEEI-2024-013).

### **2. Results**

#### **PSNP accumulated in mouse liver and entered the hepatocytes**

To observe the distribution of PSNPs in vivo, the fluorescence imaging in mice after oral exposure was performed. By gavage of 150 mg/kg·bw red fluorescence-labelled PSNPs into mice, we observed continuous changes in fluorescence signal intensity over 24 h (Figure S1a). The fluorescence signals tended to disappear after 24 h after a single oral gavage. We then collected multiple organs (heart, lungs, liver, spleen, kidneys and intestine) from mice after 12 and 24 hours of gavage. PSNPs were

clearly distributed in the liver (Figure S1b and 1c). Additionally, immunofluorescence of liver paraffin sections showed that PSNPs were internalized into hepatocytes (Figure S1d). Therefore, this study was conducted in the human normal hepatocytes to investigate the regulatory mechanisms and effects of PSNP exposure on hepatic metabolism.

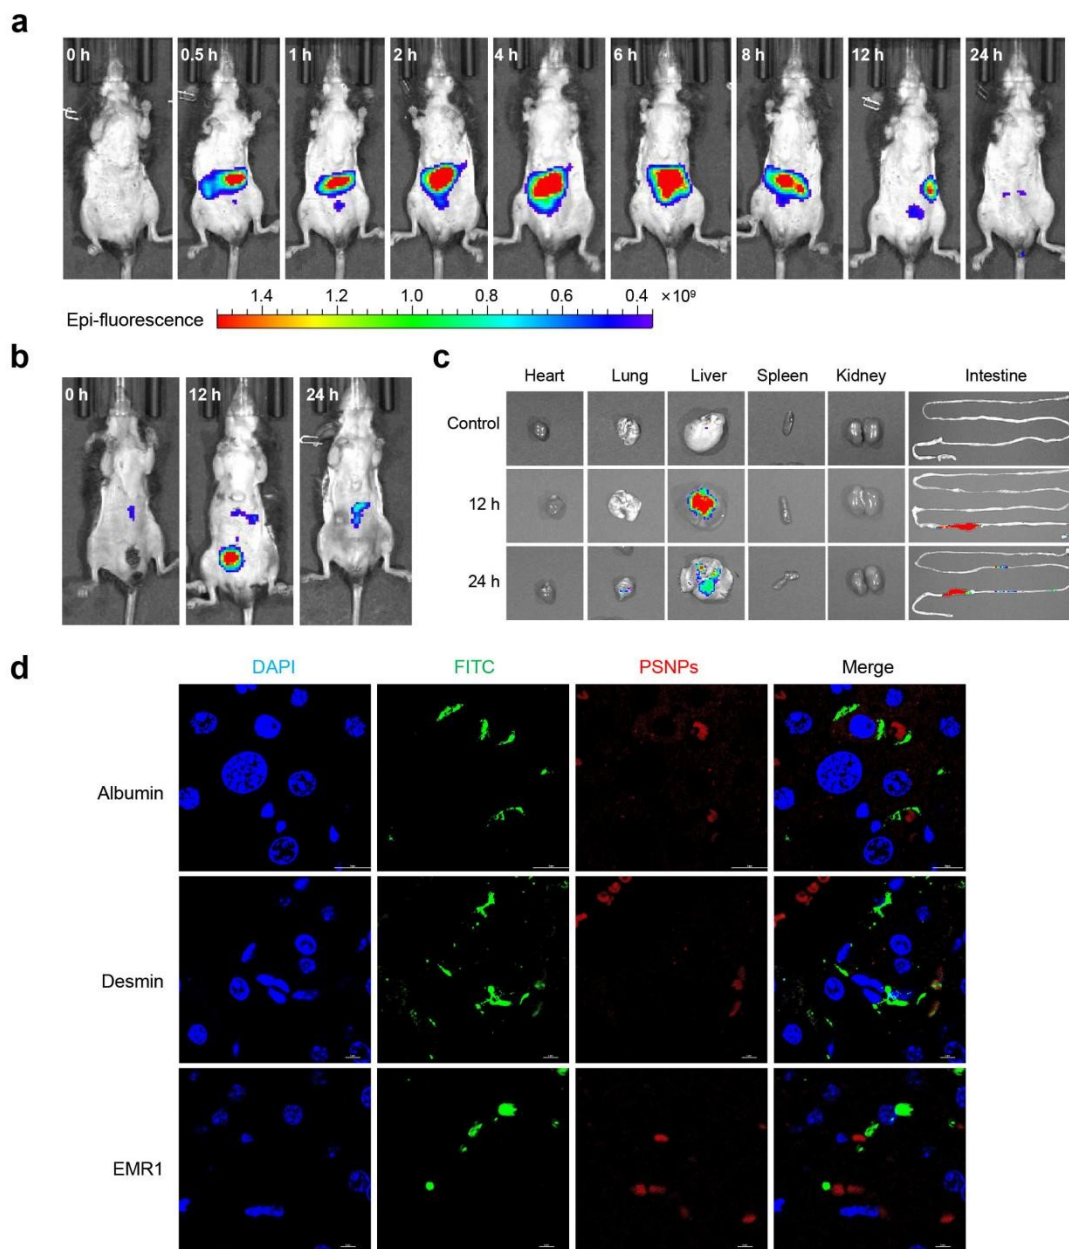

**Figure S1 PSNPs accumulated in mouse liver after a single oral gavage.** (a) Representative fluorescence images of whole-body distribution of red-fluorescent labelled PSNPs in living mice. After a single gavage of 150 mg/kg·bw of particles, changes in fluorescence intensity were observed at intervals of 0, 0.5, 1, 2, 4, 6, 8, 12,

and 24 h by a small animal in vivo imaging analysis system. (b-c) Mice at each sample time (0, 12, 24 h) were sacrificed to collect tissues. Ex vivo images of fluorescence intensities for each organ (heart, lung, liver, spleen, kidney, intestine) indicated the accumulation of PSNPs in the liver of mice. (d) Immunofluorescence of liver tissue sections from red-fluorescent labelled PSNPs-administered mice (150mg/kg·bw, 24h). Red fluorescence representing PSNPs appeared in hepatocytes, indicating the main cell type in which they were internalised . DAPI nuclear; FITC: albumin: hepatocytes, desmin: hepatic stellate cells, EMR: macrophage; Red: red-fluorescent labelled PSNPs. Scale bar = 5  $\mu$ m.

**Table S1 The list of primer sequences**

| Gene    | Forward (5'-3')        | Reverse (3'-5')        | Amplicon length (bp) |
|---------|------------------------|------------------------|----------------------|
| ANGPTL4 | GGCTCAGTGGAACCTCAACCG  | CCGTGATGCTATGCACCTTCT  | 103                  |
| ACSBG1  | ACACTGTGCATCGGATGTTCT  | AGGAGATGTGTTCCCACTTGT  | 96                   |
| CPT1A   | TCCAGTTGGCTTATCGTGGTG  | TCCAGAGTCCGATTGATTTTGC | 98                   |
| ACADVL  | ACAGATCAGGTGTTCCCATACC | CTTGGCGGGATCGTTCACCT   | 114                  |
| HMGCS2  | GACTCCAGTGAAGCGCATTCT  | CTGGGAAGTAGACCTCCAGG   | 179                  |
| PSAT1   | TGCCGCACTCAGTGTGTTAG   | GCAATTCCTCGCACAAGATTCT | 141                  |
| PSPH    | GAGGACGCGGTGTCAGAAAT   | GGTTGCTCTGCTATGAGTCTCT | 131                  |
| PHGDH   | CTGCGGAAAGTGCTCATCAGT  | TGGCAGAGCGAACAATAAGGC  | 154                  |
| MAOA    | TTCAGGACTATCTGCTGCCAA  | GGTCCCACATAAGCTCCACC   | 147                  |
| COMT    | TACTGCGAGCAGAAGGAGTG   | CCAGCGAAATCCACCATCC    | 227                  |

## Western blot raw data

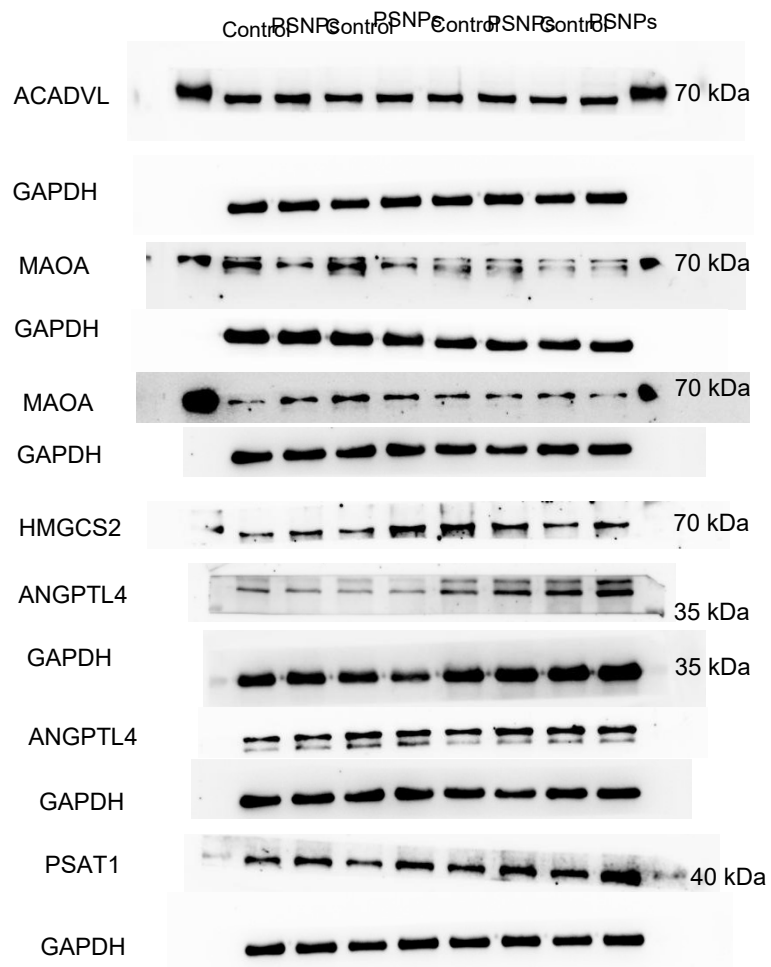

## References

- 1 K. Senathirajah, S. Attwood, G. Bhagwat, M. Carbery, S. Wilson and T. Palanisami, *J Hazard Mater*, 2021, **404**, 124004.
- 2 A. B. Nair and S. Jacob, *Journal of Basic and Clinical Pharmacy*, 2016, **7**, 27.
